# Supplementary material for: High-throughput sequencing-based analysis of endogenetic fungal communities inhabiting the Chinese Cordyceps reveals unexpectedly high fungal diversity
Source: PubMed Central journal article supplement (PMC5022047; doi:10.1038/srep33437), 2016-09-14
Supplement: srep33437-s1.pdf [file srep33437-s1.pdf]

## Supplemental information:

Research article

### High-throughput sequencing-based analysis of endogenetic fungal communities inhabiting the

#### Chinese Cordyceps reveals unexpectedly high fungal diversity

Fei Xia<sup>1,2</sup>, Xin Chen<sup>3</sup>, Meng-Yuan Guo<sup>1</sup>, Xiao-Hui Bai<sup>1</sup>, Yan Liu<sup>1</sup>, Guang-Rong Shen<sup>1</sup>, Yu-Ling Li<sup>4</sup>,  
Juan Lin<sup>2\*</sup>, Xuan-Wei Zhou<sup>1\*</sup>

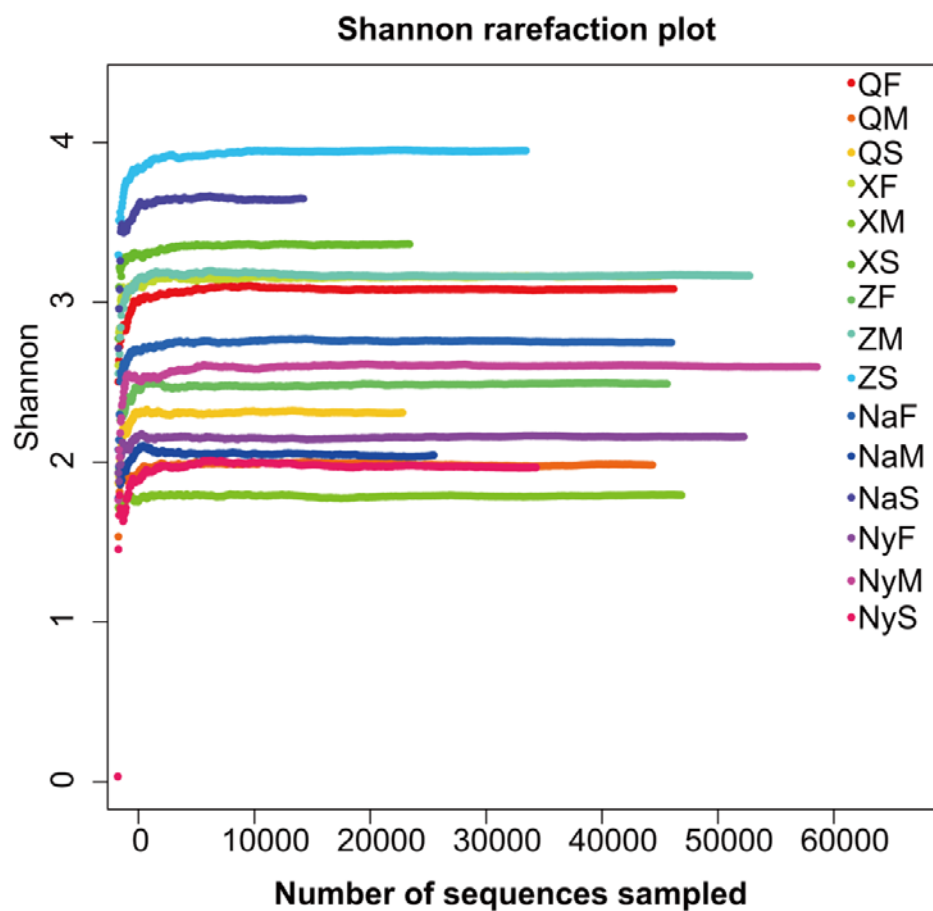

**Fig. S1 Rarefaction curve of the ITS sequences.** In the panel, the x-axis represents the number of sequences and the y-axis represents the number of operational taxonomic units (OTUs) determined at a 97% similarity.

Table S1 Distance between fungal endophyte communities inhabiting different samples of natural DCXC collected from different areas

|     | XF   | XM   | XS   | QF   | QM   | QS   | ZF   | ZM   | ZS   | NaF  | NaM  | NaS  | NyF  | NyM  | NyS |
|-----|------|------|------|------|------|------|------|------|------|------|------|------|------|------|-----|
| XO  | 0    |      |      |      |      |      |      |      |      |      |      |      |      |      |     |
| XM  | 0.14 | 0    |      |      |      |      |      |      |      |      |      |      |      |      |     |
| XS  | 0.62 | 0.68 | 0    |      |      |      |      |      |      |      |      |      |      |      |     |
| QO  | 0.09 | 0.12 | 0.63 | 0    |      |      |      |      |      |      |      |      |      |      |     |
| QM  | 0.16 | 0.07 | 0.69 | 0.14 | 0    |      |      |      |      |      |      |      |      |      |     |
| QS  | 0.62 | 0.51 | 0.5  | 0.56 | 0.58 | 0    |      |      |      |      |      |      |      |      |     |
| ZO  | 0.18 | 0.13 | 0.62 | 0.12 | 0.17 | 0.47 | 0    |      |      |      |      |      |      |      |     |
| ZM  | 0.13 | 0.23 | 0.59 | 0.13 | 0.24 | 0.62 | 0.16 | 0    |      |      |      |      |      |      |     |
| ZS  | 0.64 | 0.69 | 0.53 | 0.58 | 0.7  | 0.46 | 0.62 | 0.60 | 0    |      |      |      |      |      |     |
| NaO | 0.12 | 0.13 | 0.63 | 0.07 | 0.15 | 0.52 | 0.10 | 0.15 | 0.62 | 0    |      |      |      |      |     |
| NaM | 0.26 | 0.26 | 0.75 | 0.26 | 0.16 | 0.68 | 0.32 | 0.34 | 0.76 | 0.29 | 0    |      |      |      |     |
| NaS | 0.50 | 0.53 | 0.37 | 0.48 | 0.53 | 0.35 | 0.44 | 0.49 | 0.39 | 0.47 | 0.64 | 0    |      |      |     |
| NyO | 0.12 | 0.13 | 0.65 | 0.14 | 0.14 | 0.66 | 0.19 | 0.21 | 0.75 | 0.17 | 0.25 | 0.57 | 0    |      |     |
| NyM | 0.14 | 0.14 | 0.68 | 0.15 | 0.08 | 0.68 | 0.25 | 0.21 | 0.69 | 0.19 | 0.16 | 0.58 | 0.15 | 0    |     |
| NyS | 0.54 | 0.45 | 0.49 | 0.48 | 0.50 | 0.16 | 0.39 | 0.53 | 0.49 | 0.45 | 0.61 | 0.26 | 0.56 | 0.59 | 0   |

Table S2. Summary of detected fungus at each taxonomy level

| No. <sup>a</sup> | Phylum <sup>b</sup> | Class                | Order               | Family               | Genus                   | Species                                        |
|------------------|---------------------|----------------------|---------------------|----------------------|-------------------------|------------------------------------------------|
| 1                | Ascomycota          | Agaricomycetes       | Agaricales          | Amanitaceae          | <i>Alatospora</i>       | <i>Alatospora acuminata</i>                    |
| 2                | Basidiomycota       | Agaricostilbomycetes | Agaricostilbales    | Ascobolaceae         | <i>Amanita</i>          | <i>Apodus</i> sp.                              |
| 3                | Glomeromycota       | Dothideomycetes      | Auriculariales      | Bionectriaceae       | <i>Apodus</i>           | <i>Ascobolaceae</i> sp.                        |
| 4                | Zygomycota          | Eurotiomycetes       | Cantharellales      | Ceratobasidiaceae    | <i>Ascobolus</i>        | <i>Ascobolus</i> sp.                           |
| 5                | Unidentified        | Glomeromycetes       | Capnodiales         | Chaetomiaceae        | <i>Aspergillus</i>      | <i>Ascomycota</i> sp. FL-2010c                 |
| 6                |                     | Incertae_sedis       | Chaetosphaeriales   | Chaetosphaeriaceae   | <i>Beauveria</i>        | <i>Candida catenulata</i>                      |
| 7                |                     | Leotiomycetes        | Chaetothyriales     | Clavariaceae         | <i>Candida</i>          | <i>Candida glaeobosa</i>                       |
| 8                |                     | Microbotryomycetes   | Coniochaetales      | Clavicipitaceae      | <i>Cephaliphora</i>     | <i>Cephaliphora</i> sp.                        |
| 9                |                     | Pezizomycetes        | Cystofilobasidiales | Cordycipitaceae      | <i>Chaetomium</i>       | <i>Cladosporium halotolerans</i>               |
| 10               |                     | Saccharomycetes      | Diaporthales        | Cortinariaceae       | <i>Cladophialophora</i> | <i>Clavaria californica</i>                    |
| 11               |                     | Sordariomycetes      | Eurotiales          | Cucurbitariaceae     | <i>Cladosporium</i>     | <i>Clavaria</i> sp.                            |
| 12               |                     | Tremellomycetes      | Filobasidiales      | Cystofilobasidiaceae | <i>Clavaria</i>         | <i>Clonostachys rosea</i> f. <i>catenulata</i> |
| 13               |                     | Ustilaginomycetes    | Glomerales          | Davidiellaceae       | <i>Clonostachys</i>     | <i>Coniochaetales</i> sp.                      |
| 14               |                     | Unidentified         | Helotiales          | Filobasidiaceae      | <i>Cortinarius</i>      | <i>Cryptococcus aerius</i>                     |
| 15               |                     |                      | Hypocreales         | Glomeraceae          | <i>Cryptococcus</i>     | <i>Cylindrotrichum</i> sp.                     |

|    |                   |                      |                        |                                   |
|----|-------------------|----------------------|------------------------|-----------------------------------|
| 16 | Incertae_sedis    | Glomosporiaceae      | <i>Curvularia</i>      | <i>Exophiala salmonis</i>         |
| 17 | Leotiales         | Herpotrichiellaceae  | <i>Cylindrotrichum</i> | <i>Filobasidium uniguttulatum</i> |
| 18 | Leucosporidiales  | Hyaloscyphaceae      | <i>Exophiala</i>       | <i>Fontanospora eccentrica</i>    |
| 19 | Malasseziales     | Hygrophoraceae       | <i>Filobasidium</i>    | <i>Funneliformis mosseae</i>      |
| 20 | Microascales      | Incertae_sedis       | <i>Fontanospora</i>    | <i>Fusarium brachygibbosum</i>    |
| 21 | Mortierellales    | Inocybaceae          | <i>Funneliformis</i>   | <i>Fusarium</i> cf dimerum 21535  |
| 22 | Pezizales         | Lasio-sphaeriaceae   | <i>Fusarium</i>        | <i>Fusarium pseudensiforme</i>    |
| 23 | Pleosporales      | Leotiaceae           | <i>Glarea</i>          | <i>Guehomyces pullulans</i>       |
| 24 | Russulales        | Leucosporidiaceae    | <i>Guehomyces</i>      | <i>Herpotrichia coulteri</i>      |
| 25 | Saccharomycetales | Massarinaceae        | <i>Herpotrichia</i>    | <i>Hyalopeziza</i> sp. TNS-F17975 |
| 26 | Sebacinales       | Microascaceae        | <i>Hyalopeziza</i>     | <i>Hygrocybe conica</i>           |
| 27 | Sordariales       | Mortierellaceae      | <i>Hygrocybe</i>       | <i>Ilyonectria mors-panacis</i>   |
| 28 | Sporidiobolales   | Mycenaceae           | <i>Ilyonectria</i>     | <i>Inocybe ericetorum</i>         |
| 29 | Thelephorales     | Nectriaceae          | <i>Inocybe</i>         | <i>Malassezia restricta</i>       |
| 30 | Tremellales       | Ophiocordycipitaceae | <i>Lachnum</i>         | <i>Mastigobasidium</i> sp.        |
| 31 | Trichosporonales  | Plectosphaerellaceae | <i>Lecanicillium</i>   | <i>Metarhizium pinghaense</i>     |
| 32 | Urocystidales     | Pleosporaceae        | <i>Malassezia</i>      | <i>Mortierella acrotona</i>       |

|    |              |                     |                         |                                    |
|----|--------------|---------------------|-------------------------|------------------------------------|
| 33 | Xylariales   | Pseudeurotiaceae    | <i>Mastigobasidium</i>  | <i>Mortierella amoeboidea</i>      |
| 34 | Unidentified | Pyronemataceae      | <i>Metarhizium</i>      | <i>Mortierella bainieri</i>        |
| 35 |              | Russulaceae         | <i>Mortierella</i>      | <i>Mortierella elongatula</i>      |
| 36 |              | Saccharomycetaceae  | <i>Mrakia</i>           | <i>Mortierella pseudozygospora</i> |
| 37 |              | Schizophyllaceae    | <i>Mycena</i>           | <i>Mortierella</i> sp. 04M 158     |
| 38 |              | Sclerotiniaceae     | <i>Myrothecium</i>      | <i>Mortierella</i> sp. WD32A       |
| 39 |              | Sebacinaceae        | <i>Nectria</i>          | <i>Mrakia frigida</i>              |
| 40 |              | Sebacinales_Group_B | <i>Neonectria</i>       | <i>Mycena cinerella</i>            |
| 41 |              | Sporormiaceae       | <i>Ophiocordyceps</i>   | <i>Myrothecium tongaense</i>       |
| 42 |              | Teratosphaeriaceae  | <i>Penicillium</i>      | <i>Nectria ramulariae</i>          |
| 43 |              | Thelephoraceae      | <i>Phaeoacremonium</i>  | <i>Ophiocordyceps sinensis</i>     |
| 44 |              | Togniniaceae        | <i>Phialocephala</i>    | <i>Penicillium bialowiezense</i>   |
| 45 |              | Trichocomaceae      | <i>Pochonia</i>         | <i>Phaeoacremonium tuscanum</i>    |
| 46 |              | Trichosporonaceae   | <i>Preussia</i>         | <i>Phialocephala fortinii</i>      |
| 47 |              | Vibrisseaceae       | <i>Pseudaleuria</i>     | <i>Pleosporaceae</i> sp. RS-5      |
| 48 |              | Unidentified        | <i>Pseudallescheria</i> | <i>Pochonia</i> sp.                |
| 49 |              |                     | <i>Pseudogymnoascus</i> | <i>Preussia terricola</i>          |

|    |                          |                                    |
|----|--------------------------|------------------------------------|
| 50 | <i>Pyrenochaetopsis</i>  | <i>Pseudaleuria</i> sp.            |
| 51 | <i>Russula</i>           | <i>Pseudallescheria fimeti</i>     |
| 52 | <i>Saccharicola</i>      | <i>Pseudogymnoascus roseus</i>     |
| 53 | <i>Schizophyllum</i>     | <i>Russula citrinochlora</i>       |
| 54 | <i>Sebacina</i>          | <i>Russula</i> sp. OTU322          |
| 55 | <i>Serendipita</i>       | <i>Saccharicola</i> sp.            |
| 56 | <i>Sporobolomyces</i>    | <i>Sebacina</i> mycobiont          |
| 57 | <i>Stachybotrys</i>      | <i>Sebacina</i> incrustans         |
| 58 | <i>Sterigmatomyces</i>   | <i>Serendipita</i> herbamans       |
| 59 | <i>Tetracladium</i>      | <i>Slopeiomyces cylindrosporus</i> |
| 60 | <i>Thecaphora</i>        | <i>Sporobolomyces coprosmae</i>    |
| 61 | <i>Tomentella</i>        | <i>Stachybotrys oleronensis</i>    |
| 62 | <i>Trichosporon</i>      | <i>Sterigmatomyces halophilus</i>  |
| 63 | <i>Verticillium</i>      | <i>Thecaphora amaranthi</i>        |
| 64 | <i>Volutella</i>         | <i>Trichosporon dehoogii</i>       |
| 65 | <i>Zygosaccharomyces</i> | <i>Verticillium dahliae</i>        |
| 66 | Unidentified             | <i>Volutella ciliata</i>           |

67

*Xylariales* sp.

68

*Zygosaccharomyces rouxii*

69

Unidentified

---

a. The numbers indicate the amount of taxonomy detected in current study at each level. The taxonomy information was obtained with higher than 80% confidence.

b. There was not affiliation relationship of the taxonomy in each row.
